# Supplementary material
Source: PubMed Central journal article supplement (PMC7757424)
Supplement: NIHMS1651025-supplement-supp_material_2.pdf [file NIHMS1651025-supplement-supp_material_2.pdf]

1 **Identifying the transcriptional response of cancer and inflammation-related genes in lung**  
2 **cells in relation to ambient air chemical mixtures in Houston, Texas**

3  
4 Lauren A. Eaves<sup>1</sup>, Hang T. Nguyen<sup>1</sup>, Julia E. Rager<sup>1,2,3</sup>, Kenneth G. Sexton<sup>1</sup>, Thomas Howard<sup>3</sup>,  
5 Lisa Smeester<sup>1,3</sup>, Anastasia N. Freedman<sup>1</sup>, Kjersti M. Aagaard<sup>4</sup>, Cynthia Shope<sup>4</sup>, Barry Lefer<sup>5,6</sup>,  
6 James H. Flynn<sup>5</sup>, Mathew H. Erickson<sup>5</sup>, Rebecca C. Fry<sup>1,2,3</sup>, and William Vizuete\*<sup>1,2</sup>

7  
8 <sup>1</sup>Department of Environmental Sciences and Engineering, Gillings School of Global Public Health,  
9 The University of North Carolina at Chapel Hill, Chapel Hill, NC, USA.

10 <sup>2</sup>Curriculum in Toxicology, The University of North Carolina at Chapel Hill, Chapel Hill, NC,  
11 USA

12 <sup>3</sup>The Institute for Environmental Health Solutions, Gillings School of Global Public Health, The  
13 University of North Carolina at Chapel Hill, Chapel Hill, NC, USA

14 <sup>4</sup>Department of Obstetrics & Gynecology, Division of Maternal Fetal Medicine, Baylor College  
15 of Medicine, Houston, TX, USA.

16 <sup>5</sup>Department of Earth and Atmospheric Sciences, University of Houston, Houston, TX, USA.

17 <sup>6</sup>Tropospheric Composition Program, Earth Science Division, NASA, Washington DC, USA  
18

19  
20 **SUPPORTING INFORMATION**

21  
22 **FIGURES: 3**  
23 **TABLES: 3 (excel documents)**  
24 **PAGES: 4**

25 **FIGURE S1: Locations of the field site where the A549 cells were exposed and the CAMS 403 surface**  
 26 **monitor. Listed at each location are the hazardous air pollutants that were measured as well as the number of**  
 27 **alkane and alkene species that were measured at the CAMS 403 monitor.**  
 28  
 29

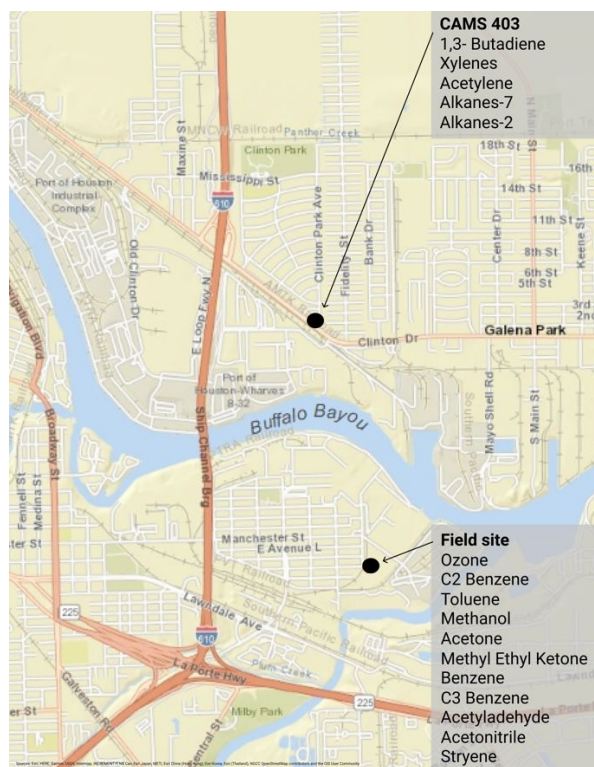

30  
 31  
 32

33 **FIGURE S2: Correlations of air pollutants used to further evaluate and confirm co-occurring chemicals in**  
 34 **the atmosphere throughout the five exposure days.** The legend on the right-hand side demonstrate the color  
 35 spectrum representative of the correlation coefficient value. The size of the circle is also representative of the  
 36 strength of correlation according to the absolute value of the correlation coefficient.  
 37

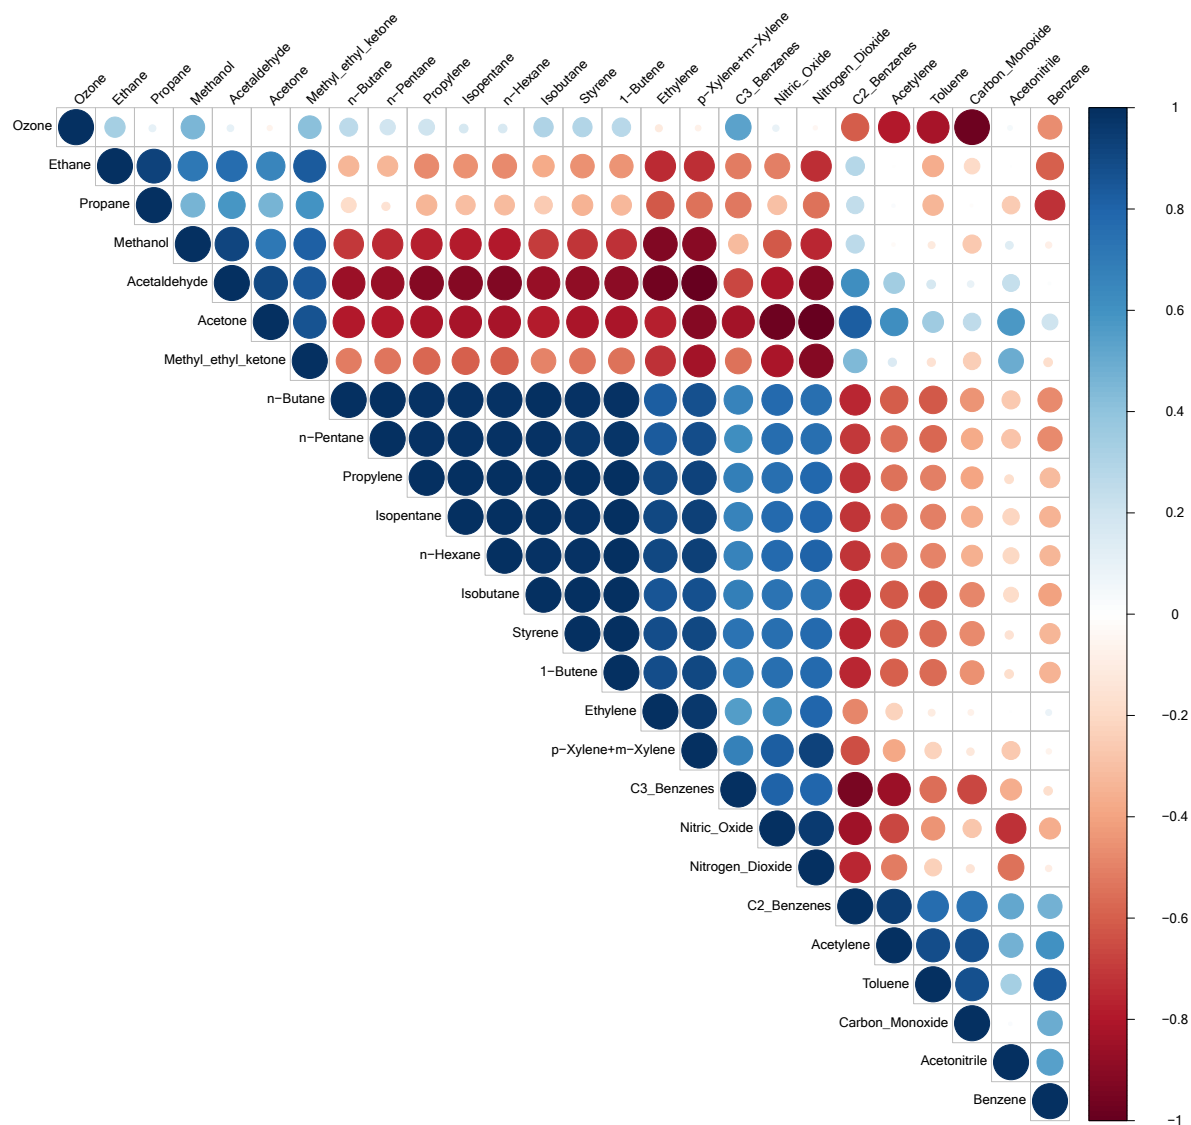

38

39 **Figure S3: Cytotoxicity assessment.** Percentage cell death when exposed to ozone, ambient air and clean air  
40 exposure. The asterisks represent significant increase in cell death at  $p < 0.05$ .  
41  
42

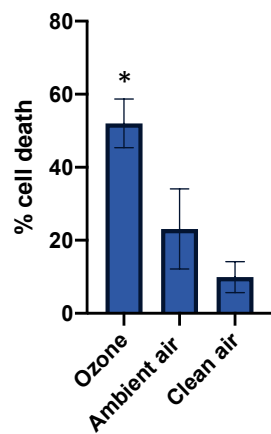

43
